# Supplementary figures and images for: Atherogenic Lipoprotein(a) Increases Vascular Glycolysis, Thereby Facilitating Inflammation and Leukocyte Extravasation
Source: PubMed Central journal article supplement — Circ Res. 2020 Mar 12;126(10):1346–59. doi: 10.1161/CIRCRESAHA.119.316206 (PMC7208285; doi:10.1161/circresaha.119.316206), 2020-03-12

**Figure 1I**

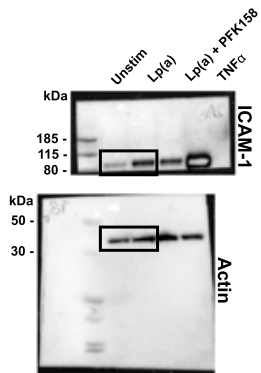

**Figure 5D**

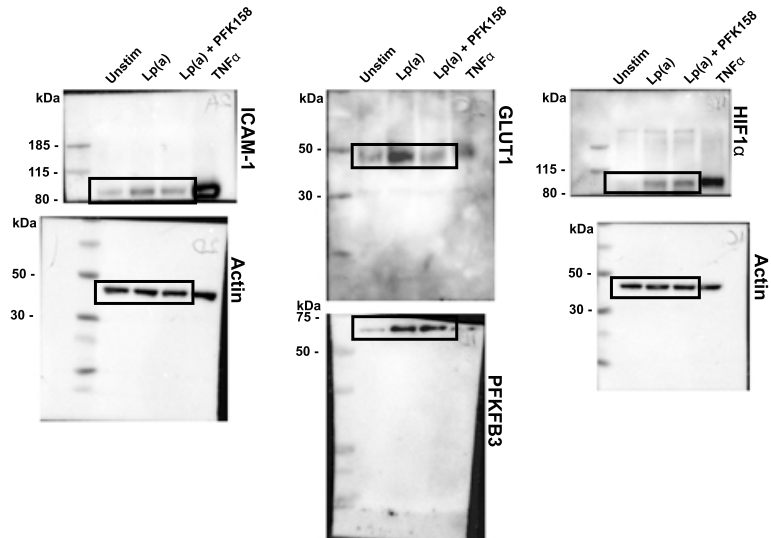

**Figure S2B**

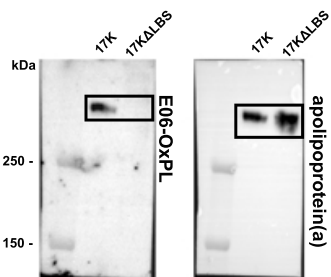

Supplement: res-126-1346-s003.pdf [file res-126-1346-s003.pdf]
